# Supplementary material
Source: PubMed Central journal article supplement (PMC7582223)

## **SUPPLEMENTARY MATERIAL**

### **Sex and Gender Disparities in the Management and Outcomes of Acute Myocardial**

#### **Infarction-Cardiogenic Shock in Older Adults**

Saraschandra Vallabhajosyula, MD; Saarwaani Vallabhajosyula, MBBS; Shannon M Dunlay, MD MS; Sharonne N Hayes, MD; Patricia JM Best, MD; Jorge A Brenes-Salazar, MD; Amir Lerman, MD; Bernard J Gersh, MBChB DPhil; Allan S Jaffe, MD; Malcolm R Bell, MD; David R Holmes, Jr., MD; Gregory W Barsness, MD

**Supplementary Table 1. Administrative codes used for identification of diagnoses and procedures**

| <b>Comorbidity</b>                  | <b>International Classification of Diseases 9.0 Clinical Modification<br/>Codes</b>                                    |
|-------------------------------------|------------------------------------------------------------------------------------------------------------------------|
| Cardiac arrest                      | 427.5                                                                                                                  |
| Coronary angiography                | 37.22, 37.23, 88.53-88.56                                                                                              |
| Percutaneous coronary intervention  | 00.66, 36.01, 36.02, 36.05, 36.06, 36.07, 88.57                                                                        |
| Invasive hemodynamic assessment     | 37.21, 37.23, 204 (Clinical Classification Software)                                                                   |
| Mechanical circulatory support      | 37.61, 37.68, 39.65                                                                                                    |
| Invasive mechanical ventilation     | 96.7, 96.70, 96.71, 96.72                                                                                              |
| Non-invasive mechanical ventilation | 93.90                                                                                                                  |
| Hemodialysis                        | 39.95                                                                                                                  |
| Hepatic failure                     | 570.0, 572.2, 573.3, 573.4                                                                                             |
| Respiratory failure                 | 518.81, 518.82, 518.85, 786.09, 799.1, 96.7, 96.70, 96.71, 96.72                                                       |
| Renal failure                       | 584, 584.5, 584.6, 584.7, 584.8, 584.9                                                                                 |
| Hematologic failure                 | 286.6-286.9, 287.4, 287.5                                                                                              |
| Neurological failure                | 293, 293.0, 293.1, 293.8, 293.81-293.84, 293.89, 293.9, 348.1, 348.3,<br>348.30, 348.81, 348.39, 780.01, 780.09, 89.14 |

**Supplementary Table 2. Classification of hospitals by bedsize by the Healthcare Cost and Utilization Project**

| Location and teaching status |                           | Hospital bedsize |         |       |
|------------------------------|---------------------------|------------------|---------|-------|
|                              |                           | Small            | Medium  | Large |
| <b>Northeast</b>             | <b>Rural</b>              | 1-49             | 50-99   | 100+  |
|                              | <b>Urban non-teaching</b> | 1-124            | 125-199 | 200+  |
|                              | <b>Urban teaching</b>     | 1-249            | 250-424 | 425+  |
| <b>Midwest</b>               | <b>Rural</b>              | 1-29             | 30-49   | 50+   |
|                              | <b>Urban non-teaching</b> | 1-74             | 75-174  | 175+  |
|                              | <b>Urban teaching</b>     | 1-249            | 250-374 | 375+  |
| <b>South</b>                 | <b>Rural</b>              | 1-39             | 40-74   | 75+   |
|                              | <b>Urban non-teaching</b> | 1-99             | 100-199 | 200+  |
|                              | <b>Urban teaching</b>     | 1-249            | 250-449 | 450+  |
| <b>West</b>                  | <b>Rural</b>              | 1-24             | 25-44   | 45+   |
|                              | <b>Urban non-teaching</b> | 1-99             | 100-174 | 175+  |
|                              | <b>Urban teaching</b>     | 1-199            | 200-324 | 325+  |

**Supplementary Table 3. Multivariable regression for in-hospital mortality admissions<sup>a</sup>**

| Total cohort<br>(N = 134,501) |                 | Odds ratio         | 95% confidence interval |             | P     |
|-------------------------------|-----------------|--------------------|-------------------------|-------------|-------|
|                               |                 |                    | Lower Limit             | Upper Limit |       |
| Female sex                    |                 | 1.05               | 1.02                    | 1.08        | <.001 |
| Race                          | White           | Reference category |                         |             |       |
|                               | Black           | 0.97               | 0.92                    | 1.03        | .38   |
|                               | Hispanic        | 1.01               | 0.95                    | 1.07        | .76   |
|                               | Asian           | 1.00               | 0.92                    | 1.08        | .97   |
|                               | Native American | 1.08               | 0.84                    | 1.40        | .54   |
|                               | Others          | 0.88               | 0.81                    | 0.95        | .001  |
| Year of admission             | 2000            | Reference category |                         |             |       |
|                               | 2001            | 1.09               | 1.01                    | 1.17        | .03   |
|                               | 2002            | 0.97               | 0.90                    | 1.05        | .49   |
|                               | 2003            | 0.93               | 0.86                    | 1.00        | .05   |
|                               | 2004            | 0.88               | 0.82                    | 0.95        | .001  |
|                               | 2005            | 0.80               | 0.75                    | 0.87        | <.001 |
|                               | 2006            | 0.76               | 0.71                    | 0.82        | <.001 |
|                               | 2007            | 0.76               | 0.71                    | 0.82        | <.001 |
|                               | 2008            | 0.69               | 0.64                    | 0.74        | <.001 |
|                               | 2009            | 0.55               | 0.51                    | 0.59        | <.001 |
|                               | 2010            | 0.58               | 0.54                    | 0.62        | <.001 |
|                               | 2011            | 0.57               | 0.53                    | 0.61        | <.001 |
|                               | 2012            | 0.59               | 0.55                    | 0.64        | <.001 |
|                               | 2013            | 0.57               | 0.53                    | 0.61        | <.001 |
|                               | 2014            | 0.57               | 0.53                    | 0.61        | <.001 |

|                                                         |                                         |                    |      |      |       |
|---------------------------------------------------------|-----------------------------------------|--------------------|------|------|-------|
| <b>Primary payer</b>                                    | <b>Medicare</b>                         | Reference category |      |      |       |
|                                                         | <b>Medicaid</b>                         | 0.90               | 0.80 | 1.00 | .06   |
|                                                         | <b>Private</b>                          | 1.01               | 0.96 | 1.07 | .66   |
|                                                         | <b>Uninsured</b>                        | 1.65               | 1.39 | 1.95 | <.001 |
|                                                         | <b>No Charge</b>                        | 0.85               | 0.50 | 1.44 | .55   |
|                                                         | <b>Others</b>                           | 1.20               | 1.02 | 1.41 | .02   |
| <b>Quartile of median household income for zip code</b> | <b>0-25<sup>th</sup></b>                | Reference category |      |      |       |
|                                                         | <b>26<sup>th</sup>-50<sup>th</sup></b>  | 1.01               | 0.97 | 1.05 | .57   |
|                                                         | <b>51<sup>st</sup>-75<sup>th</sup></b>  | 1.00               | 0.96 | 1.04 | .91   |
|                                                         | <b>75<sup>th</sup>-100<sup>th</sup></b> | 1.06               | 1.02 | 1.11 | .003  |
| <b>Hospital teaching status and location</b>            | <b>Rural</b>                            | Reference category |      |      |       |
|                                                         | <b>Urban Non-Teaching</b>               | 0.81               | 0.77 | 0.86 | <.001 |
|                                                         | <b>Urban Teaching</b>                   | 0.79               | 0.75 | 0.83 | <.001 |
| <b>Hospital bed-size</b>                                | <b>Small</b>                            | Reference category |      |      |       |
|                                                         | <b>Medium</b>                           | 0.93               | 0.88 | 0.98 | .004  |
|                                                         | <b>Large</b>                            | 0.94               | 0.89 | 0.98 | .005  |
| <b>Hospital region</b>                                  | <b>Northeast</b>                        | Reference category |      |      |       |
|                                                         | <b>Midwest</b>                          | 0.90               | 0.86 | 0.94 | <.001 |
|                                                         | <b>South</b>                            | 0.87               | 0.84 | 0.91 | <.001 |
|                                                         | <b>West</b>                             | 0.92               | 0.88 | 0.96 | <.001 |
| <b>Charlson Comorbidity Index</b>                       | <b>4-6</b>                              | Reference category |      |      |       |
|                                                         | <b>≥ 7</b>                              | 0.93               | 0.90 | 0.95 | <.001 |
| <b>Type of AMI</b>                                      | <b>STEMI</b>                            | Reference category |      |      |       |
|                                                         | <b>NSTEMI</b>                           | 0.57               | 0.56 | 0.59 | <.001 |
| <b>Acute organ failure</b>                              | <b>Respiratory</b>                      | 1.15               | 1.12 | 1.19 | <.001 |

|                                           |                    |      |      |      |       |
|-------------------------------------------|--------------------|------|------|------|-------|
|                                           | <b>Renal</b>       | 1.22 | 1.19 | 1.26 | <.001 |
|                                           | <b>Hepatic</b>     | 1.43 | 1.35 | 1.51 | <.001 |
|                                           | <b>Hematologic</b> | 0.75 | 0.71 | 0.78 | <.001 |
|                                           | <b>Neurologic</b>  | 0.92 | 0.88 | 0.96 | <.001 |
| <b>Cardiac arrest</b>                     |                    | 2.38 | 2.30 | 2.47 | <.001 |
| <b>Coronary angiography</b>               |                    | 0.40 | 0.38 | 0.42 | <.001 |
| <b>Percutaneous coronary intervention</b> |                    | 0.65 | 0.62 | 0.67 | <.001 |
| <b>Invasive hemodynamic monitoring</b>    |                    | 1.05 | 1.01 | 1.09 | .02   |
| <b>Mechanical circulatory support</b>     |                    | 1.05 | 1.01 | 1.08 | .01   |
| <b>Invasive mechanical ventilation</b>    |                    | 1.95 | 1.89 | 2.01 | <.001 |
| <b>Hemodialysis</b>                       |                    | 1.27 | 1.17 | 1.37 | <.001 |

<sup>a</sup>AMI = acute myocardial infarction; NSTEMI = non-ST-elevation myocardial infarction;

STEMI = ST-elevation myocardial infarction

c-statistic of model: 0.89

## SUPPLEMENTARY FIGURE LEGENDS

### Supplementary Figure. Trends in the prevalence and in-hospital mortality in older AMI-CS admissions stratified by hospital characteristics

**Legend:** Fifteen-year trends in older men (solid line) and older women (dashed line) in admission stratified by hospital location and teaching status (A), hospital bedsize (B) and hospital region (C); all  $p < .001$  for trend over time. All values are percentage of admissions in each sex admitted to the different hospital categories (location/teaching status, bedsize and region).

**Abbreviations:** AMI: acute myocardial infarction; CS: cardiogenic shock

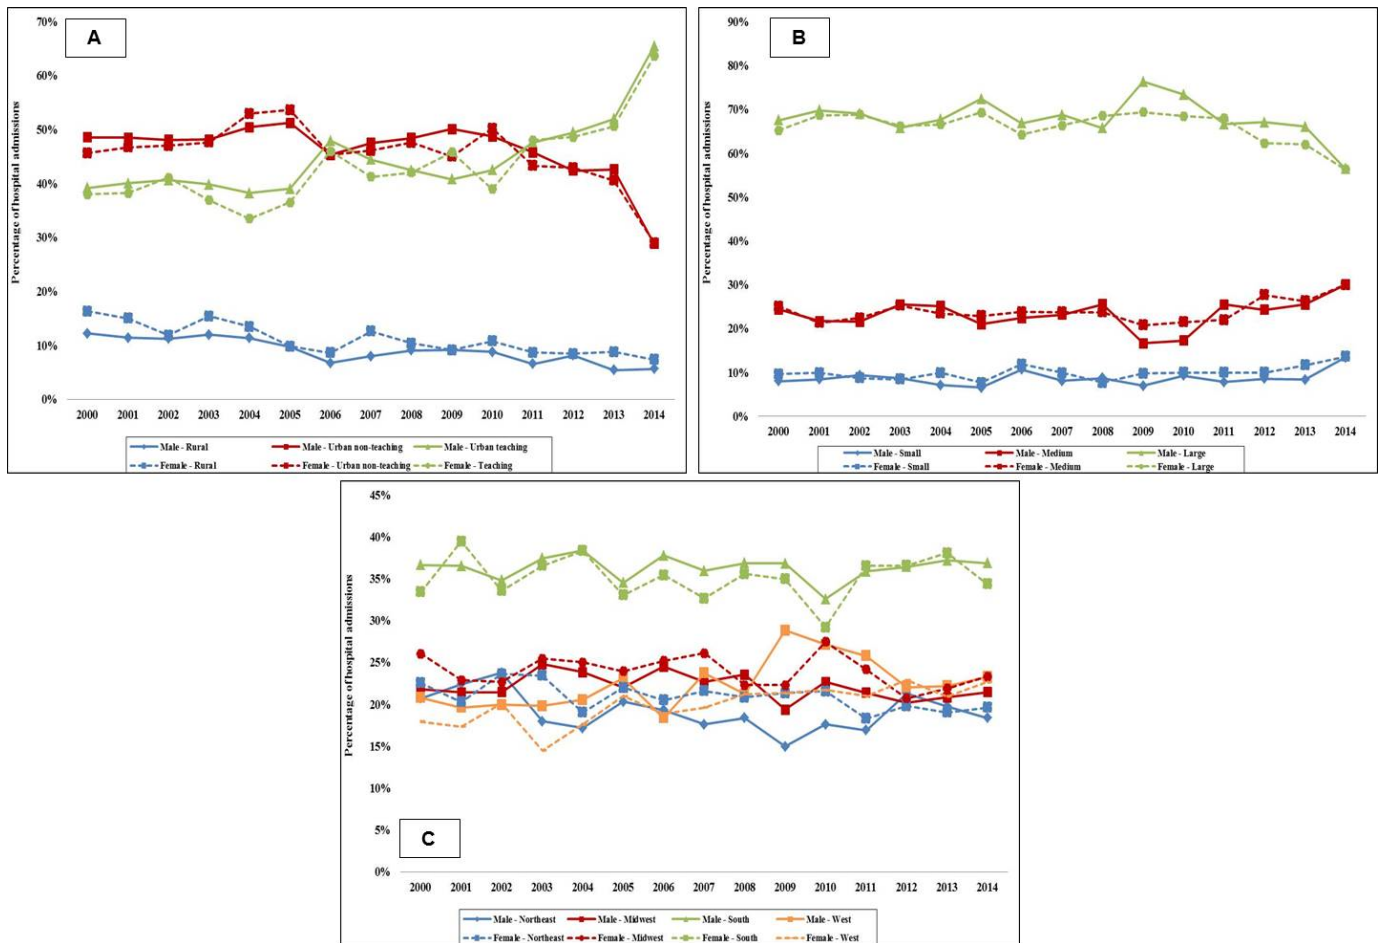

Supplement: NIHMS1570293-supplement-1.pdf [file NIHMS1570293-supplement-1.pdf]
